# Supplementary material for: Physical events occurring during the cryopreservation of immortalized human T cells
Source: PLoS One. 2019 May 23;14(5):e0217304. doi: 10.1371/journal.pone.0217304 (PMC6532914; doi:10.1371/journal.pone.0217304)
Supplement: S5 Table — Metabolic activity was evaluated through the reduction of resazurin to the fluorescent resorufin. Fluorescent intensities were normalised to 1 at the -50°C, 24 h time point. (XLSX) [file pone.0217304.s005.xlsx]

## Sheet: Table S5
S5 Table. Raw data behind the metabolic activity of Jurkat cells cooled down at 1°C min-1 to separate endpoints before plunging into liquid nitrogen. Metabolic activity was evaluated through the reduction of resazurin to the fluorescent resorufin. Fluorescent intensities were normalised to 1 at the -50°C, 24 h time point.
Endpoint temperature	Measurement performed after	Replicate #					mean	SD
		1	2	3	4	5
4°C	24h post-thaw	0.0633893	0.0641325	0.0578679	0.101083	0.125186	0.0823317	0.0294813
	48h post-thaw	-0.112338	-0.124443	-0.208643	-0.119771	-0.0669994	-0.126439	0.051327
	72h post-thaw	0.393289	0.406668	0.424294	0.452538	0.42578	0.420514	0.0223631
-10°C	24h post-thaw	-0.0258017	0.030155	0.0259078	0.0105118	0.0114674	0.0104481	0.0220366
	48h post-thaw	0.433001	0.368125	0.248779	0.294967	0.278934	0.324761	0.0747618
	72h post-thaw	0.222446	0.212784	0.257273	0.258017	0.267467	0.243597	0.0242977
-25°C	24h post-thaw	0.0462943	0.0765555	0.0805904	0.0250584	0.0456573	0.0548312	0.0233396
	48h post-thaw	0.493842	0.464005	0.394139	0.429178	0.484073	0.453047	0.041191
	72h post-thaw	0.328732	0.381928	0.41941	0.39605	0.375027	0.380229	0.0334189
-40°C	24h post-thaw	0.510299	0.593969	0.514759	0.520917	0.469208	0.521831	0.0451578
	48h post-thaw	1.42992	1.35475	1.08951	1.04014	1.11648	1.20616	0.174185
	72h post-thaw	0.617859	0.363347	0.506583	0.553515	0.476959	0.503653	0.0947843
-50°C	24h post-thaw	0.93831	0.911446	0.952962	0.873115	1.32417	1	0.183741
	48h post-thaw	1.19994	1.1048	1.25674	1.18125	1.55628	1.2598	0.174418
	72h post-thaw	1.01593	1.03345	1.34232	1.19463	1.63007	1.24328	0.253724
-60°C	24h post-thaw	1.05054	1.13559	1.01072	0.951901	1.18061	1.06587	0.0925902
	48h post-thaw	1.12943	1.13145	0.98556	1.26375	1.25281	1.1526	0.11323
	72h post-thaw	1.51911	1.57804	1.5635	1.55362	1.51635	1.54612	0.027353
-80°C	24h post-thaw	1.07496	1.25961	1.22457	1.06838	1.15948	1.1574	0.0861443
	48h post-thaw	1.42121	1.57295	1.30962	1.33032	1.46772	1.42037	0.107117
	72h post-thaw	1.50372	1.65247	1.64217	1.30134	1.63814	1.54757	0.150591
-100°C	24h post-thaw	1.25536	1.26099	1.1736	1.28732	1.38777	1.27301	0.0769932
	48h post-thaw	1.94638	1.67732	1.78191	1.80973	1.9776	1.83859	0.123486
	72h post-thaw	1.77256	1.20609	1.86887	1.9107	1.96401	1.74445	0.309007
